# Supplementary material
Source: HighWire-hosted journal article supplement (https://tobaccocontrol.bmj.com/content/tc-2022-057843)
Supplement: inline-supplementary-material-1 [file inline-supplementary-material-1.pdf]

## SUPPLEMENTARY MATERIAL

Table A1. Descriptive statistics of variables included in the crowding-out estimation

| Variable name                 | Variable label                                                                  | All sample<br>(n=908,103) |         | Low income<br>(n=370,685) |         | Middle income<br>(n=374,321) |         | High income<br>(n=163,097) |         |
|-------------------------------|---------------------------------------------------------------------------------|---------------------------|---------|---------------------------|---------|------------------------------|---------|----------------------------|---------|
|                               |                                                                                 | Mean                      | Std dev | Mean                      | Std dev | Mean                         | Std dev | Mean                       | Std dev |
| <b>Dependent variables</b>    |                                                                                 |                           |         |                           |         |                              |         |                            |         |
| Staple                        | Share of staple food exp. out of total non-tobacco expenditures                 | 0.1099                    | 0.0714  | 0.1603                    | 0.0713  | 0.0931                       | 0.0456  | 0.0427                     | 0.0320  |
| Meat and fish                 | Share of meat and fish exp. out of total non-tobacco expenditures               | 0.0676                    | 0.0500  | 0.0685                    | 0.0506  | 0.0731                       | 0.0497  | 0.0548                     | 0.0472  |
| Dairy                         | Share of dairy food exp. out of total non-tobacco expenditures                  | 0.0304                    | 0.0321  | 0.0313                    | 0.0302  | 0.0317                       | 0.0334  | 0.0259                     | 0.0327  |
| Fruit and vegetables          | Share of vegetable and fruit exp. out of total non-tobacco expenditures         | 0.07509                   | 0.04085 | 0.08485                   | 0.04009 | 0.07632                      | 0.03905 | 0.05308                    | 0.03743 |
| Beverages                     | Share of beverages exp. out of total non-tobacco expenditures                   | 0.0541                    | 0.0306  | 0.0599                    | 0.0308  | 0.0538                       | 0.0295  | 0.0431                     | 0.0291  |
| Ready-made food               | Share of ready-made food exp. out of total non-tobacco expenditures             | 0.1562                    | 0.0992  | 0.1521                    | 0.0918  | 0.1605                       | 0.0996  | 0.1557                     | 0.1116  |
| Other food                    | Share of other food (spices, oils) exp. out of total non-tobacco expenditures   | 0.0426                    | 0.0243  | 0.0537                    | 0.0238  | 0.0412                       | 0.0209  | 0.0231                     | 0.0174  |
| Clothing                      | Share of clothing exp. out of total non-tobacco expenditures                    | 0.0304                    | 0.0201  | 0.0275                    | 0.0170  | 0.0325                       | 0.0204  | 0.0317                     | 0.0240  |
| Housing                       | Share of housing exp. out of total non-tobacco expenditures                     | 0.1223                    | 0.0832  | 0.0966                    | 0.0611  | 0.1282                       | 0.0777  | 0.1622                     | 0.1099  |
| Utilities and fuels           | Share of utilities exp. out of total non-tobacco expenditures                   | 0.0951                    | 0.0498  | 0.0873                    | 0.0387  | 0.0927                       | 0.0436  | 0.1152                     | 0.0713  |
| Durable and non-durable goods | Share of durable & non-durable goods exp. out of total non-tobacco expenditures | 0.0697                    | 0.0764  | 0.0503                    | 0.0384  | 0.0721                       | 0.0671  | 0.1037                     | 0.1238  |
| Education                     | Share of education exp. out of total non-tobacco expenditures                   | 0.0278                    | 0.0443  | 0.0256                    | 0.0317  | 0.0263                       | 0.0401  | 0.0350                     | 0.0674  |
| Health care                   | Share of health care exp. out of total non-tobacco expenditures                 | 0.0391                    | 0.0563  | 0.0361                    | 0.0414  | 0.0388                       | 0.0557  | 0.0456                     | 0.0785  |
| Transportation                | Share of transportation exp. out of total non-tobacco expenditures              | 0.0663                    | 0.0520  | 0.0599                    | 0.0496  | 0.0671                       | 0.0484  | 0.0773                     | 0.0611  |
| Entertainment                 | Share of entertainment exp. out of total non-tobacco expenditures               | 0.0132                    | 0.0510  | 0.0057                    | 0.0212  | 0.0120                       | 0.0425  | 0.0306                     | 0.0901  |

| Variable name                             | Variable label                                                                                                                    | All sample<br>(n=908,103) |         | Low income<br>(n=370,685) |         | Middle income<br>(n=374,321) |         | High income<br>(n=163,097) |         |
|-------------------------------------------|-----------------------------------------------------------------------------------------------------------------------------------|---------------------------|---------|---------------------------|---------|------------------------------|---------|----------------------------|---------|
|                                           |                                                                                                                                   | Mean                      | Std dev | Mean                      | Std dev | Mean                         | Std dev | Mean                       | Std dev |
| Alcohol                                   | Share of alcohol exp. out of total non-tobacco expenditures                                                                       | 0.0004                    | 0.0057  | 0.0004                    | 0.0048  | 0.0004                       | 0.0057  | 0.0004                     | 0.0073  |
| <b>Endogenous variables</b>               |                                                                                                                                   |                           |         |                           |         |                              |         |                            |         |
| exptob                                    | Total amount of tobacco expenditure (Rp)                                                                                          | 259,522                   | 342,563 | 172,289                   | 212,150 | 313,999                      | 359,550 | 325,034                    | 461,235 |
| lnM                                       | Log of total non-tobacco expenditure                                                                                              | 14.92                     | 0.72    | 14.41                     | 0.51    | 15.05                        | 0.49    | 15.71                      | 0.66    |
| lnM <sup>2</sup>                          | Square of (log) total non-tobacco expenditure                                                                                     | 223.25                    | 21.74   | 207.82                    | 14.43   | 226.63                       | 14.65   | 247.39                     | 20.89   |
| <b>Preference heterogeneity variables</b> |                                                                                                                                   |                           |         |                           |         |                              |         |                            |         |
| tob                                       | Dummy variable for tobacco spender                                                                                                | 0.64                      | 0.48    | 0.67                      | 0.47    | 0.66                         | 0.47    | 0.52                       | 0.50    |
| tob x lnM                                 | Interaction term                                                                                                                  | 9.51                      | 7.20    | 9.65                      | 6.83    | 10.01                        | 7.13    | 8.24                       | 7.86    |
| (tob x lnM) <sup>2</sup>                  | Interaction term                                                                                                                  | 142.30                    | 108.52  | 139.87                    | 99.37   | 151.10                       | 108.10  | 129.58                     | 124.22  |
| <b>Instrument variables</b>               |                                                                                                                                   |                           |         |                           |         |                              |         |                            |         |
| lnX                                       | Total household expenditure (log)                                                                                                 | 14.9981                   | 0.7177  | 14.4846                   | 0.5181  | 15.1278                      | 0.4870  | 15.7655                    | 0.6436  |
| lnX <sup>2</sup>                          | Total household expenditure (log, squared)                                                                                        | 225.4570                  | 21.5977 | 210.0719                  | 14.8176 | 229.0887                     | 14.6020 | 248.9647                   | 20.3562 |
| madultshare                               | Share of male adult out of total household member                                                                                 | 0.4883                    | 0.2112  | 0.4742                    | 0.1853  | 0.4912                       | 0.2027  | 0.5108                     | 0.2670  |
| <b>Alternative instrument variables</b>   |                                                                                                                                   |                           |         |                           |         |                              |         |                            |         |
| madulratio                                | Ratio of male adult to female adult household member                                                                              | 1.0803                    | 0.7084  | 1.0792                    | 0.7053  | 1.1055                       | 0.7129  | 1.0319                     | 0.7029  |
| predictsmoke_dhs17                        | Predicted probability of smoking (household member average)<br>based on smoking determinant parameters obtained from DHS17        | 0.3606                    | 0.1511  | 0.3773                    | 0.1381  | 0.3577                       | 0.1450  | 0.3329                     | 0.1807  |
| predictsmoke_sus20                        | Predicted probability of smoking (household member average)<br>based on smoking determinant parameters obtained from Susenas 2020 | 0.2904                    | 0.2319  | 0.2846                    | 0.2093  | 0.3023                       | 0.2285  | 0.2779                     | 0.2761  |
| <b>Control variables</b>                  |                                                                                                                                   |                           |         |                           |         |                              |         |                            |         |
| yeduc                                     | Average years of education of adult household members                                                                             | 7.8510                    | 3.3347  | 7.0345                    | 2.8532  | 8.0716                       | 3.1336  | 9.0427                     | 4.1024  |
| hhsz                                      | Number of household members                                                                                                       | 3.7592                    | 1.6516  | 4.2176                    | 1.7028  | 3.6489                       | 1.5065  | 3.0628                     | 1.5400  |
| nchild05                                  | Number of children 0 to 5 years old in the household                                                                              | 0.4028                    | 0.6129  | 0.5230                    | 0.6692  | 0.3641                       | 0.5768  | 0.2395                     | 0.5084  |
| nchild15                                  | Number of children 6 to 14 years old in the household                                                                             | 0.6033                    | 0.7681  | 0.7731                    | 0.8410  | 0.5548                       | 0.7135  | 0.3606                     | 0.6295  |
| nsenior65                                 | Number of seniors >65 years old in the household                                                                                  | 0.1961                    | 0.4693  | 0.2580                    | 0.5322  | 0.1650                       | 0.4275  | 0.1343                     | 0.3947  |
| sworking                                  | Share of adult household member who work                                                                                          | 0.5860                    | 0.2884  | 0.5571                    | 0.2699  | 0.5962                       | 0.2819  | 0.6231                     | 0.3285  |

| Variable name | Variable label                    | All sample<br>(n=908,103) |         | Low income<br>(n=370,685) |         | Middle income<br>(n=374,321) |         | High income<br>(n=163,097) |         |
|---------------|-----------------------------------|---------------------------|---------|---------------------------|---------|------------------------------|---------|----------------------------|---------|
|               |                                   | Mean                      | Std dev | Mean                      | Std dev | Mean                         | Std dev | Mean                       | Std dev |
| urban         | 1 if household live in urban area | 0.5462                    | 0.4979  | 0.4279                    | 0.4948  | 0.5293                       | 0.4991  | 0.8166                     | 0.3870  |
| y17           | =1 if year=2017 (base)            | 0.3287                    | 0.4697  | 0.3287                    | 0.4697  | 0.3287                       | 0.4698  | 0.3287                     | 0.4697  |
| y18           | =1 if year=2018                   | 0.3325                    | 0.4711  | 0.3325                    | 0.4711  | 0.3325                       | 0.4711  | 0.3325                     | 0.4711  |
| y19           | =1 if year=2019                   | 0.3388                    | 0.4733  | 0.3388                    | 0.4733  | 0.3388                       | 0.4733  | 0.3388                     | 0.4733  |

Source: Pooled Susenas (2017-2019)

Notes: Expenditure data have been adjusted for inflation and are presented in March 2019 price level. Income groups are determined based on the distribution of households' per capita expenditures: Low-income (<41%), Middle-income (41%-80%), and High-income (>80%).

Table A2. Statistical Test (All households)

|                                                                                | (1)                  | (2)                 | (3)                  | (4)                  | (5)                 | (6)                 | (7)                 | (8)                 | (9)                  | (10)                 | (11)                        | (12)                | (13)                | (14)                | (15)                 |
|--------------------------------------------------------------------------------|----------------------|---------------------|----------------------|----------------------|---------------------|---------------------|---------------------|---------------------|----------------------|----------------------|-----------------------------|---------------------|---------------------|---------------------|----------------------|
|                                                                                | Staple               | Meat and fish       | Dairy                | Fruit and vegetables | Beverages           | Ready-made food     | Other food          | Clothing            | Housing              | Utilities and fuels  | Durable & non-durable goods | Education           | Health-care         | Transportation      | Entertainment        |
| <b>Heteroskedasticity test</b><br>(Pagan-Hall general test statistic, p-value) | 31286.01<br>(0.0000) | 1809.58<br>(0.0000) | 18752.75<br>(0.0000) | 163.57<br>(0.0000)   | 489.23<br>(0.0000)  | 734.20<br>(0.0000)  | 1558.57<br>(0.0000) | 2137.63<br>(0.0000) | 19708.59<br>(0.0000) | 19685.56<br>(0.0000) | 68816.97<br>(0.0000)        | 9469.33<br>(0.0000) | 7334.00<br>(0.0000) | 1437.80<br>(0.0000) | 20572.26<br>(0.0000) |
| <b>Under identification test</b><br>(Kleibergen-Paap rk LM-test, p-value)      | 4609.09<br>(0.0000)  | 4609.09<br>(0.0000) | 4609.09<br>(0.0000)  | 4609.09<br>(0.0000)  | 4609.09<br>(0.0000) | 4609.09<br>(0.0000) | 4609.09<br>(0.0000) | 4609.09<br>(0.0000) | 4609.09<br>(0.0000)  | 4609.09<br>(0.0000)  | 4609.09<br>(0.0000)         | 4609.09<br>(0.0000) | 4609.09<br>(0.0000) | 4609.09<br>(0.0000) | 4609.09<br>(0.0000)  |
| <b>Weak identification test</b><br>(Kleibergen-Paap rk Wald F statistic)       | 1580.87              | 1580.87             | 1580.87              | 1580.87              | 1580.87             | 1580.87             | 1580.87             | 1580.87             | 1580.87              | 1580.87              | 1580.87                     | 1580.87             | 1580.87             | 1580.87             | 1580.87              |
| <b>Endogeneity test</b><br>(GMM-C-Statistics, p-value)                         | 408.74<br>(0.0000)   | 1187.66<br>(0.0000) | 748.56<br>(0.0000)   | 3256.49<br>(0.0000)  | 2440.81<br>(0.0000) | 1856.51<br>(0.0000) | 976.09<br>(0.0000)  | 843.48<br>(0.0000)  | 292.13<br>(0.0000)   | 257.75<br>(0.0000)   | 295.81<br>(0.0000)          | 142.02<br>(0.0000)  | 30.40<br>(0.0000)   | 2195.41<br>(0.0000) | 292.61<br>(0.0000)   |
| <b>Household preference test</b><br>(Chi-square, p-value)                      | 4604.45<br>(0.0000)  | 1302.70<br>(0.0000) | 856.45<br>(0.0000)   | 2193.69<br>(0.0000)  | 3485.66<br>(0.0000) | 1858.62<br>(0.0000) | 1105.92<br>(0.0000) | 534.70<br>(0.0000)  | 550.07<br>(0.0000)   | 168.38<br>(0.0000)   | 433.09<br>(0.0000)          | 117.62<br>(0.0000)  | 35.24<br>(0.0000)   | 2328.25<br>(0.0000) | 258.92<br>(0.0000)   |

Notes: Results of statistical test by income groups are available upon request

Table A3. Result of 3SLS regression (All households)

|                                                                       | (1)                      | (2)                       | (3)                      | (4)                       | (5)                      | (6)                      | (7)                       | (8)                       |
|-----------------------------------------------------------------------|--------------------------|---------------------------|--------------------------|---------------------------|--------------------------|--------------------------|---------------------------|---------------------------|
| All group                                                             | Staple                   | Meat and fish             | Dairy                    | Fruit and vegetables      | Beverages                | Ready-made food          | Other food (spices, oils) | Clothing                  |
| Dummy variable for tobacco spender ( <i>tob</i> )                     | 0.712***<br>(0.0331)     | -1.335***<br>(0.0371)     | -0.407***<br>(0.0217)    | -1.499***<br>(0.0344)     | 0.786***<br>(0.0250)     | 0.901***<br>(0.0878)     | -0.495***<br>(0.0158)     | -0.262***<br>(0.0142)     |
| Total amount of tobacco spending ( <i>exptob</i> )                    | -0.0048***<br>(0.00002)  | -0.0094***<br>(0.00002)   | -0.0044***<br>(0.00001)  | -0.0137***<br>(0.00002)   | 0.0102***<br>(0.00002)   | 0.0364***<br>(0.00005)   | -0.0043***<br>(0.00001)   | -0.0026***<br>(0.00001)   |
| Log of total non-tobacco expenditure ( <i>lnM</i> )                   | -0.279***<br>(0.00265)   | 0.144***<br>(0.00297)     | 0.0284***<br>(0.00173)   | -0.00943***<br>(0.00276)  | 0.0866***<br>(0.00200)   | 0.343***<br>(0.00703)    | -0.0334***<br>(0.00126)   | 0.0396***<br>(0.00114)    |
| Square of (log) total non-tob expenditure ( <i>lnM</i> ) <sup>2</sup> | 0.00742***<br>(0.00009)  | -0.00465***<br>(0.0001)   | -0.0009***<br>(0.00006)  | -0.00001<br>(0.00009)     | -0.00335***<br>(0.00007) | -0.0127***<br>(0.00024)  | 0.000639***<br>(0.00004)  | -0.00114***<br>(0.00004)  |
| Interaction term ( <i>tob x lnM</i> )                                 | -0.0864***<br>(0.00429)  | 0.163***<br>(0.00481)     | 0.0471***<br>(0.00281)   | 0.180***<br>(0.00446)     | -0.0874***<br>(0.00324)  | -0.0881***<br>(0.0114)   | 0.0613***<br>(0.00204)    | 0.0310***<br>(0.00184)    |
| Interaction term [ <i>(tob x lnM)</i> <sup>2</sup> ]                  | 0.00270***<br>(0.000137) | -0.00475***<br>(0.000154) | -0.00125***<br>(0.00009) | -0.00506***<br>(0.000143) | 0.00218***<br>(0.000104) | 0.00124***<br>(0.000365) | -0.00180***<br>(0.00007)  | -0.000851***<br>(0.00006) |
| Household characteristics                                             | Yes                      | Yes                       | Yes                      | Yes                       | Yes                      | Yes                      | Yes                       | Yes                       |
| Year dummy                                                            | Yes                      | Yes                       | Yes                      | Yes                       | Yes                      | Yes                      | Yes                       | Yes                       |
| Observations                                                          | 908,103                  | 908,103                   | 908,103                  | 908,103                   | 908,103                  | 908,103                  | 908,103                   | 908,103                   |
| R-squared                                                             | 0.529                    | -0.211                    | -0.002                   | -0.562                    | -0.469                   | -0.725                   | 0.072                     | -0.103                    |

Source: Authors' estimation based on Susenas 2017-2019 using Equation 4

Notes: Standard error is reported in parentheses. Parameters *exptob* are multiplied by 100,000. \*\*\*, \*\*, and \* denote significance at 1%, 5%, and 10% levels, respectively. Parameters of household characteristics and year dummy are not reported in this table. The household's characteristics include whether they lived in a rural/urban area, average years of education of adult household members, the share of adult members who work, household composition: number of infants, productive age persons, and seniors in the household. Regression results by income groups are available upon request.

Table A3. Result of 3SLS regression (All households) - continued

|                                                                           | (9)                       | (10)                      | (11)                          | (12)                     | (13)                     | (14)                     | (15)                    |
|---------------------------------------------------------------------------|---------------------------|---------------------------|-------------------------------|--------------------------|--------------------------|--------------------------|-------------------------|
| All group                                                                 | Housing                   | Utilities and fuels       | Durable and non-durable goods | Education                | Health care              | Transportation           | Entertainment           |
| Dummy variable for tobacco spender ( <i>tob</i> )                         | -0.835***<br>(0.0516)     | 0.247***<br>(0.0322)      | 0.585***<br>(0.0491)          | -0.00525<br>(0.0274)     | 0.235***<br>(0.0373)     | 1.440***<br>(0.0415)     | -0.0918***<br>(0.0343)  |
| Total amount of tobacco spending ( <i>exptob</i> )                        | -0.0045***<br>(0.00003)   | -0.0018***<br>(0.00002)   | -0.0071***<br>(0.00003)       | -0.0031***<br>(0.00002)  | -0.0008***<br>(0.00002)  | 0.0145***<br>(0.00003)   | -0.0049***<br>(0.00002) |
| Log of total non-tobacco expenditure ( <i>lnM</i> )                       | -0.0339***<br>(0.00413)   | -0.209***<br>(0.00258)    | -0.214***<br>(0.00393)        | 0.00244<br>(0.00219)     | 0.0201***<br>(0.00299)   | 0.217***<br>(0.00333)    | -0.105***<br>(0.00274)  |
| Square of (log) total non-tobacco expenditure ( <i>lnM</i> ) <sup>2</sup> | 0.00183***<br>(0.00014)   | 0.00745***<br>(0.00009)   | 0.00843***<br>(0.00013)       | 0.000227***<br>(0.00007) | -0.000305***<br>(0.0001) | -0.00701***<br>(0.00011) | 0.00414***<br>(0.00009) |
| Interaction term ( <i>tob x lnM</i> )                                     | 0.101***<br>(0.00668)     | -0.0303***<br>(0.00417)   | -0.0936***<br>(0.00636)       | 0.000242<br>(0.00355)    | -0.0324***<br>(0.00484)  | -0.168***<br>(0.00538)   | 0.00545<br>(0.00444)    |
| Interaction term [ <i>(tob x lnM)</i> <sup>2</sup> ]                      | -0.00296***<br>(0.000214) | 0.000921***<br>(0.000134) | 0.00378***<br>(0.000204)      | 0.00003<br>(0.000114)    | 0.00111***<br>(0.000155) | 0.00452***<br>(0.000173) | 0.000132<br>(0.000142)  |
| Household characteristics                                                 | Yes                       | Yes                       | Yes                           | Yes                      | Yes                      | Yes                      | Yes                     |
| Year dummy                                                                | Yes                       | Yes                       | Yes                           | Yes                      | Yes                      | Yes                      | Yes                     |
| Observations                                                              | 908,103                   | 908,103                   | 908,103                       | 908,103                  | 908,103                  | 908,103                  | 908,103                 |
| R-squared                                                                 | 0.155                     | 0.081                     | 0.093                         | 0.160                    | 0.034                    | -0.402                   | 0.010                   |

Source: Authors' estimation based on Susenas 2017-2019 using Equation 4

Notes: Standard error is reported in parentheses. Parameters *exptob* are multiplied by 100,000. \*\*\*, \*\*, and \* denote significance at 1%, 5%, and 10% levels, respectively. Parameters of household characteristics and year dummy are not reported in this table. The household's characteristics include whether they lived in a rural/urban area, average years of education of adult household members, the share of adult members who work, household composition: number of infants, productive age persons, and seniors in the household. Regression results by income groups are available upon request.

**Table A4. The crowding-out effect of tobacco expenditures using alternative instruments**

|                               | Main instrument                           | Instrument alternative                               |
|-------------------------------|-------------------------------------------|------------------------------------------------------|
|                               | male adult share<br>lnX, lnX <sup>2</sup> | predicted smoke from DHS17,<br>lnX, lnX <sup>2</sup> |
| Food                          |                                           |                                                      |
| Staple                        | -0.0048***                                | -0.0015***                                           |
| Meat and fish                 | -0.0094***                                | -0.007***                                            |
| Dairy                         | -0.0044***                                | -0.0037***                                           |
| Fruit and vegetables          | -0.0137***                                | -0.0086***                                           |
| Beverages                     | 0.0102***                                 | 0.0088***                                            |
| Ready-made food               | 0.0364***                                 | 0.0294***                                            |
| Other food (spices, oils)     | -0.0043***                                | -0.0022***                                           |
| Clothing                      | -0.0026***                                | -0.0025***                                           |
| Housing                       | -0.0045***                                | -0.0048***                                           |
| Utilities and fuels           | -0.0018***                                | -0.0049***                                           |
| Durable and non-durable goods | -0.0071***                                | -0.0019***                                           |
| Education                     | -0.0031***                                | -0.0076***                                           |
| Health care                   | -0.0008***                                | -0.0012***                                           |
| Transportation                | 0.0145***                                 | 0.01***                                              |
| Entertainment                 | -0.0049***                                | -0.0027***                                           |

Source: Authors' estimation based on Susenas 2017-2019 using Equation 4

Notes: The table above presents parameters  $\text{exptob}$ , multiplied by 100,000. \*\*\*, \*\*, and \* denote significance at 1%, 5%, and 10% levels, respectively. Survey weight is applied in the regression. There are different instrument variables used in each alternative. Main instrument: share of adult males out of adult household members ( $\text{madultshare}$ ), log of total expenditure ( $\ln X$ ) and its square ( $\ln X^2$ ). Alternative instrument: Predicted probability of smoking using parameters from Demographic Health Survey 2017 ( $\text{predictedsmoke\_dhs17}$ ), ( $\ln X$ ), and ( $\ln X^2$ ).
